# Supplementary material for: A comparison between partially peeled hulless barley and whole grain hulless barley: beneficial effects on the regulation of serum glucose and the gut microbiota in high-fat diet-induced obese mice
Source: Royal Society of Chemistry journal article supplement (doi:10.1039/d2fo02098j), 2022-12-05
Supplement: d2fo02098j2.xlsx [file d2fo02098j2.xlsx]

## Sheet: BW
week	0	1	2	3	4	5	6	7	8	9	10	11	12
NCD	21.8	22.7	23.02	24.27	24.7	24.52	24.73	25.46	25.52	26.14	26.33	26.13	26.63
	22.47	25.6	27.16	28.58	28.01	28.6	29.15	29.9	29.78	29.81	29.93	29.92	29.73
	24.12	25.94	25.99	27.76	28.21	29.12	30.32	29.91	30.21	30.48	30.3	30.4	30.34
	23.05	25.33	26.9	27.83	28.79	29.16	30.04	29.66	30.35	31.21	30.92	30.77	30.51
	23.48	25.77	27.27	27.7	27.97	28.84	29.52	29.92	29.92	30.42	30.16	30.18	30.45
	22.68	24.81	27.06	28.71	30.22	30.67	31.9	31.64	32.86	33.25	33.27	32.04	32.35
	23.15	24.57	26.85	28.54	28.59	29.94	29.95	30.55	30.95	31.8	32.01	31.38	31.17
	24.01	25.62	26.57	27.83	28.46	30.17	30.25	30.76	30.79	31.41	31.84	31.17	31.25
HFD	22.61	25.46	26.83	28.66	29.6	31.07	31.93	32.2	34.43	36.33	36.12	38.69	40.01
	24.84	26.21	27.9	30.03	30.44	31.52	33.33	35.11	36.77	39.34	40.07	42.76	44.48
	23.7	26.43	28	30.36	31.79	33.99	36.44	36.58	39.09	40.6	42.96	43.91	45.35
	21.54	25.1	26.97	29.22	30.11	32.14	34.13	34.67	37.15	28.97	41.58	43.68	44.25
	22.44	25.38	26.5	28.6	30.96	34.1	36.72	38.36	41.06	44.01	46.66	49.1	49.77
	22.98	25.48	27.06	29.86	31.61	34.12	37.2	38.1	39.88	42.07	44.67	45.56	46.32
	23.15	24.66	26.29	29.51	32.84	35.38	38.49	39.95	43.38	45.26	47.62	48.31	47.83
	23.56	27.1	28.4	32	32.4	34.35	36.48	37.68	40.85	43.8	47.51	50.05	50.88
PHB	21.54	23.07	24.87	27.09	28.53	31.13	32.51	32.23	34.67	36.5	38.39	40.34	41.6
	22.59	25.47	26.77	28.22	29.54	31.08	32.62	33.61	36.76	38.42	40.14	40.67	42.08
	24.15	28.7	30.23	32.34	34.76	36.47	38.06	39.59	42.14	45.28	48.76	49.43	49.74
	23.14	26.69	27.14	29.48	30.86	33.12	34.96	36.08	39.74	43.19	46.37	48.38	49.7
	23.46	27.61	29.35	31.53	32.79	34.8	36.26	37.83	39.6	42.05	44.76	47.4	48.62
	22.88	26.37	27.05	29.73	32	33.57	35.03	36.62	38.36	40.51	43.75	45.32	47.17
	23.05	26.91	29.22	32.59	34.13	38.05	40.64	43.1	45.03	47.56	49.65	51.29	51.76
	23.96	27.54	29.89	32.8	34.48	37.46	39.42	41.67	44.5	47.12	49.67	50.87	51.43
WHB	23.26	24.94	27.08	30.39	33.42	36.01	37.82	40.46	44.97	47.81	50.05	51.91	52.96
	23.75	23.83	25.11	26.3	27.36	28.6	29.98	30.96	32.74	34.37	35.33	41.89	37.53
	23.6	26.42	29	33.01	34.68	38.29	41	43.34	47.36	48.72	52.44	53.66	54.29
	24.31	25.74	26.23	27.67	28.02	29.46	30.06	30.82	31.41	32.16	34.28	35.33	36.33
	21.79	24.1	25.52	28.26	29.86	31.58	33.79	35.5	38.26	40.35	42.42	42.88	43.89
	22.55	26.75	30.24	33.94	36.36	39.34	42.55	44.39	47.46	49.03	50.66	49.6	49.03
	22.92	25.99	26.42	28.07	29.95	31.13	32.67	32.02	34.82	36.5	37.81	37.98	38.49
	23.09	25.99	28.02	30.55	33.29	35.97	39.03	38.61	41.33	43.43	46.85	46.2	47.68

## Sheet: food intake
	W1	W2	3	4	5	6	7	8	9	10	11	12
NCD	3.23524	3.04048	3.11714	2.9981	2.98048	2.75571	3.17238	2.8081	2.85667	2.68524	2.64143	3.16
	3.18571	3.14429	3.16857	3.25286	3.15524	3.0419	3.1819	3.13667	2.96524	2.87952	2.76286	3.49619
	3.12393	2.95607	3.11036	3.31393	3.13821	2.84821	3.25536	3.01714	3.00714	2.97929	2.93929	3.54429
HFD	2.93143	2.66762	2.71381	3.43381	3.65238	3.17905	2.84095	2.90857	2.86048	2.53952	2.82905	3.43238
	3.41381	2.46238	2.71905	2.92048	2.7881	2.63714	2.88429	2.88476	2.80429	2.94048	2.67714	3.15333
	2.64571	2.35286	2.76036	2.64179	2.72571	2.55857	2.67571	2.74286	2.70321	2.77786	2.51607	2.86179
PHB	2.54524	2.28619	2.52286	2.50476	2.70524	2.39143	2.4619	3.04571	2.7119	2.82524	2.64619	3.23619
	2.76	2.44762	2.60857	2.6181	2.61571	2.52429	2.76952	2.97619	2.88857	2.99714	2.78048	3.12952
	2.665	3.055	3.26214	2.97643	2.79429	2.61679	2.93071	2.84893	2.94179	3.0475	2.87643	3.55464
WHB	2.53238	2.52095	2.81952	2.57429	2.6519	2.38714	2.79048	2.74714	2.65524	2.63381	2.48143	3.07429
	2.73524	3.06048	2.74381	2.68238	2.7581	2.52905	2.92333	2.80048	2.75143	2.92905	2.71571	3.55143
	2.67286	2.25857	2.80964	2.82357	2.82679	2.71	3.07	3.03893	2.90571	2.95179	2.44786	3.45786

## Sheet: OGTT-w0
	0min	15min	30min	60min	90min	120min	AUC
NCD	6.1	23	17.2	11.8	10.1	10.8	1596.75
	7.5	20.2	15.6	10.2	8	9.1	1392.75
	7.6	20.3	11.5	10	10.4	10.7	1392.75
	4.9	19.2	11.4	8.3	8.4	7.5	1194.75
	7.4	18.5	14	8.7	7.1	5.7	1207.5
	6.8	22.1	14.6	8.7	7.8	6.8	1308
	8.3	20.4	11.4	8.3	8.1	7.3	1226.25
	8.1	19.1	10.4	8.9	8.8	7.3	1221.75
HFD	5.1	23	15	9.3	8.6	7.2	1365.75
	5.5	17	12.6	7.9	7.4	7.3	1148.25
	7.6	23.2	12.9	11.6	9.4	9.9	1473.75
	7.8	19.3	13.8	9.2	7.7	6.3	1260
	9.7	21.6	15.9	11.3	7.1	5.8	1393.5
	6.6	17.1	16.9	10.2	7.9	7.4	1340.25
	7.3	19.7	11.2	8.7	7.1	9.3	1215.75
	7.3	14.9	7	6.9	6.5	5.9	926.25
PHB	7.1	20.4	10.5	8.6	8	9.5	1236
	7.6	9.2	8.4	7.8	8.1	7.1	967.5
	8.4	22.7	16.2	10.3	11.9	11.2	1602
	8.2	18.4	13.9	11.8	9.8	9.8	1445.25
	8.1	21.6	16.6	13.3	9.5	9.9	1590.75
	6.8	19	10.6	8.4	8	7.7	1182
	7.9	17.7	13.8	8.1	6.2	6.2	1157.25
	5.3	20.9	20.9	9.7	7	7	1429.5
WHB	5.1	16.6	17.9	8.9	8.4	8.6	1338
	7.8	19.3	18.9	8.9	8.5	7.1	1401.75
	7	18.6	13.3	9.1	8.5	8.9	1292.25
	7.7	21.1	16.3	8.9	9.6	9.2	1434
	7.4	18.2	14.4	9.4	8.6	7.8	1309.5
	5.9	19	16.1	6.1	6.4	6.2	1159.5
	6.1	20.6	18.9	8.2	8.1	9	1404
	7.5	15.3	15	8.1	6.9	7	1178.25

## Sheet: OGTT-w6
	0min	15min	30min	60min	90min	120min	AUC
NCD	5.8	18.7	16.1	9.2	8.1	6.8	1307.25
	5.1	14.5	13.9	7.2	6.3	7.1	1080
	6.6	16.4	17.3	7.8	6.3	7.1	1214.25
	4.4	17.5	15.8	7.6	6.1	6.7	1162.5
	5	15.3	10.2	8	5.1	6.1	981
	4.5	18.2	12.4	8.2	8.3	8.1	1202.25
	5.8	15.3	11.6	8.6	7	7.1	1108.5
	3.6	17.6	14.8	12.4	8.3	6.4	1341
HFD	7.4	19	16.7	13.8	12.4	11.1	1668.75
	5.9	22.4	17.1	17.1	12.5	10.4	1809
	6.3	19.8	21.4	15.1	12.2	9.4	1785.75
	5.7	19.1	19.5	14.3	12.3	9.2	1704
	4.8	21.3	24.3	21.9	17.1	13.6	2276.25
	6.1	24.9	21.3	14.5	1.3	11.2	1540.5
	4.6	20	24.9	20.1	12.8	10.7	2042.25
	6.3	21.5	18.8	12.2	11.6	9.9	1655.25
PHB	3.7	16.3	13.4	16.2	14.8	12.1	1685.25
	4.7	17.4	16.4	13.3	10.8	9.4	1529.25
	5.7	16.1	17.2	14.7	11.6	10.4	1616.25
	6.1	18.7	13.7	12.3	10.3	11.3	1482
	5.4	16.8	15.2	12.4	11.3	10.6	1504.5
	5.2	17.7	16.2	12.7	10.1	9.7	1498.5
	7.3	17.8	12.1	9.4	10.3	10.8	1347
	6.8	16.3	12.8	10.7	10.3	9.9	1362
WHB	4.8	11.6	14.6	9.9	9.2	7.9	1230
	6.7	16.8	18.1	16.3	14.7	12.7	1830
	5.7	14.9	14.4	9.5	9.9	10.4	1328.25
	5.6	18.8	15.8	12.5	14.2	13	1675.5
	4	14.2	14.7	11.4	9	7.6	1299.75
	6.4	15.8	13.8	10.1	10.1	9	1336.5
	4.8	15.3	17.4	11.8	9.3	8.2	1413
	6.9	20.8	14.8	12.2	12	11.1	1589.25

## Sheet: OGTT-w12
	0min	15min	30min	60min	90min	120min	AUC
NCD	3.9	17.9	14.2	7.7	5.9	7.2	1133.25
	4.3	16.4	11.6	7.3	6.2	5.7	1029.75
	4.4	15.7	9.1	6.9	5.2	5.2	914.25
	3.5	15.2	13.2	10.4	8.2	6.9	1212.75
	3.3	15.1	12.4	8.8	6.8	7	1103.25
	8.6	15.6	11.2	9.8	12.2	11.2	1378.5
	8	12.4	9	7.9	7.9	7.8	1039.5
	7.1	11.7	7.1	7	6.6	7	901.5
HFD	9.5	20.6	17.8	13.5	12.7	12.7	1757.25
	6.6	25.1	19.3	15.7	14.5	14.1	1977.75
	7.4	18.1	15.7	11.4	11.7	12.1	1554.75
	10.3	21.2	22.8	19.9	16.7	14.7	2226.75
	8.9	22.6	25.6	21.7	18.1	15.9	2414.25
	8.7	17.2	18.6	13.2	13.7	13	1743.75
	8.3	15.3	22.6	17.7	14.3	13.6	1964.25
	10.9	20.4	22.1	23.4	20.1	16.1	2431.5
PHB	5.6	15.2	18.3	10	9.4	11.3	1433.25
	6	16.9	18	16	13	10.3	1728
	7.3	19.1	16.2	12.4	12.1	11.2	1608.75
	6.8	17.2	14.9	12.1	11.2	10.3	1497.75
	8.3	19.8	18.4	15.5	12.8	10.8	1784.25
	9.2	17	9.3	13.8	13.2	13.3	1542.75
	7.7	12.5	15.9	13.4	13.3	12.7	1594.5
	7.9	16.7	13.6	13.5	12.8	11.3	1574.25
WHB	8.2	12.1	14.3	9.9	13.9	11.5
	8.1	13.1	17.2	14.8	10.8	11.7	1587.75
	5.7	14.6	16.1	12.5	12.4	10.7	1531.5
	8	15.8	15.6	10.3	10.7	7.9	1396.5
	5.4	14.7	18.5	12.2	10.1	9.5	1488.75
	6.4	15.7	16.9	9.7	9.3	8.9	1367.25
	6.9	16.9	20.4	15.7	11.6	10.8	1596.75
	8.1	21	16.8	14.8	14	14.5	1835.25

## Sheet: tissue weight
rpWAT	eWAT	pWAT	mWAT	WAT	TF
0.15	0.4	0.07	0.08	0.7	0.7
0.19	0.29	0.06	0.17	0.71	0.71
0.22	0.27	0.07	0.13	0.69	0.69
0.13	0.27	0.04	0.19	0.63	0.63
0.16	0.42	0.15	0.14	0.87	0.87
0.23	0.43	0.08	0.2	0.94	0.94
0.24	0.26	0.09	0.14	0.73	0.73
0.31	0.49	0.25	0.27	1.32	1.32
1.44	2.2	0.87	0.65	5.16	5.16
2.42	3.23	1.19	1.31	8.15	8.15
1.75	2.58	0.97	1.2	6.5	6.5
1.34	2.31	0.7	0.55	4.9	4.9
2.82	2.64	1.4	0.45	7.31	7.31
2.09	2.42	1	0.95	6.46	6.46
2.98	1.63	1.18	1.19	6.98	6.98
2.81	2.5	1.51	1.68	8.5	8.5
1.79	2.67	0.75	0.79	6	6
1.67	2.74	1.11	0.77	6.29	6.29
1.7	1.56	1.14	1.11	5.51	5.51
2.46	2.14	1.08	1.65	7.33	7.33
2.04	2.84	1.11	1.04	7.03	7.03
1.63	3.05	0.88	1.05	6.61	6.61
1.84	1.61	0.62	1.32	5.39	5.39
2.24	1.88	0.98	0.77	5.87	5.87
2.81	1.85	0.46	1.59	6.71	6.71
1.23	1.74	0.81	0.43	4.21	4.21
3.62	1.76	1.03	1.99	8.4	8.4
0.8	1.77	0.59	0.35	3.51	3.51
1.38	2.49	0.93	0.89	5.69	5.69
2.03	1.47	2.1	0.5	6.1	6.1
1.14	2.12	0.59	0.59	4.44	4.44
1.64	2.14	1.09	1.11	5.98	5.98

## Sheet: blood indexes
	GLU	CHOl	TG	HDL-C	LDL-C
NCD	4.9	3.92	0.97	1.7	0.7
	3.1	3.13	1.29	1.43	0.51
	4.1	3.48	1.04	1.45	0.61
	3.4	3.55	1	1.54	0.59
	6.7	3.63	1.04	1.6	0.63
	5.2	3.2	1.19	1.41	0.49
	4.3	3.1	0.98	1.24	0.59
	5.4	3.5	0.92	1.45	0.6
HFD	11.1	5.38	1.09	2.32	0.75
	13.6	5.88	1.16	2.53	0.91
	10.2	5.69	1.24	2.45	0.84
	10.3	5.38	0.98	2.36	0.78
	14.2	5.02	1.2	2.05	0.72
	9.2	5.23	1.03	2.3	0.69
	11.4	6.26	1.07	2.75	1.04
	10.8	7.4	1.03	3.06	1.46
PHB	7.3	6.86	1.11	2.87	1.41
	7.3	6.61	1.07	2.66	1.34
	8.5	7.17	1.1	3.06	1.61
	9.7	8.47	1.38	3.35	2.12
	8.8	7.38	1.16	3.1	1.49
	7.9	6.68	0.96	2.71	1.34
	9.8	7.67	1.08	3.26	1.63
	9.3	7.64	1.06	3.24	1.62
WHB	13.2	8.05	1.12	3.28	1.83
	12.6	6.35	0.87	2.74	1
	13.2	9.88	0.87	4.21	2.36
	9.3	6.81	0.87	2.94	1.1
	8.3	5.94	1.03	2.53	0.91
	9.7	6.72	1.16	2.95	1.2
	6.6	5.41	1.05	2.36	0.78
	11	6.18	1.01	2.71	1.03

## Sheet: F,B ratio
NCD	HFD	PHB	WHB
2.37148	33.4396	11.8303	2.39967
1.45856	41.9224	9.55635	5.2295
1.2094	29.2064	2.63083	9.8007
2.6004	28.6793	7.08456	4.25994
2.52906	24.5837	9.06185	2.0969
2.51719	28.8474	10.3683	4.70137

## Sheet: α diversity
	ace	chao	shannon	simpson
NCD	324.17	324.758	2.85215	0.155473
	369.744	382	3.76573	0.059991
	383.473	378.525	2.91442	0.167872
	351.524	354.486	2.65506	0.189091
	309.036	303.886	2.52332	0.228724
	315.181	316.333	2.92682	0.131689
	257.721	271.5	2.0009	0.341034
	406.628	407	3.68621	0.052127
HFD	282.929	283.875	3.07538	0.116052
	261.492	260.385	2.64751	0.152579
	320.831	321.107	3.62469	0.066063
	295.626	299.167	3.26143	0.098309
	247.616	251.056	3.32753	0.071977
	327.377	330.889	3.28689	0.089459
	299.974	304.875	3.75431	0.048717
	306.228	329.056	3.4206	0.080471
PHB	376.031	414.652	3.58353	0.067187
	378.496	398.4	3.42733	0.117783
	358.664	361.1	3.62204	0.078233
	238.932	250.9	2.51903	0.136245
	340.932	347.167	3.92268	0.041636
	391.521	388.917	3.89475	0.049097
	205.326	199.75	2.62925	0.141956
	363.823	365.167	3.10596	0.155681
WHB	398.983	395.324	3.83276	0.059535
	348.062	345.833	3.8139	0.061891
	370.997	377.677	3.58895	0.073041
	354.051	356.517	3.58436	0.074171
	363.998	356.75	3.78539	0.056261
	292.073	290.75	2.93129	0.126641
	366.304	370.037	3.83881	0.052511

## Sheet: bacteria 
	g__Bifidobacterium	g__Lactobacillus	g__Ileibacterium	g__norank_f__Muribaculaceae	g__norank_f__Erysipelotrichaceae	g__Desulfovibrio
NCD	0.0750135	0.0391273	0.352451	0.260175	2.35e-05	0.000399
	0.0848945	0.00698554	0.391508	0.179719	0.000115	0.002511
	0.139389	0.0237057	0.404787	0.186984	6.88e-05	0.00117
	0.0598975	0.0101428	0.469914	0.218866	0.000959	0.000768
	0.0152852	0.011236	0.309673	0.187901	0.000161	0.00067
	0.12047	0.0100022	0.581395	0.095116	0.02241	0.001488
	0.0100954	0.0835207	0.048696	0.346108	8.48e-05	0.000339
	0.0660414	0.00607759	0.194902	0.224792	7.86e-05	0.00558
HFD	0.000180403	0.0440441	0.008453	0.002216	0.000103	0.003788
	0.000546022	0.291576	0	0.002496	0	0.000156
	0	0.116641	0.000382	0.006651	0.000331	0.002064
	0	0.0636931	0	0.001546	0.00019	0.007592
	0	0.132613	0.000148	0.004108	2.46e-05	0
	0	0.0542512	0.020365	0.002525	0	0.000112
	6.24e-05	0.0113296	0.000229	0.003576	2.08e-05	8.32e-05
	0.00565804	0.310701	0.052524	0.001163	2.58e-05	0.000207
PHB	0.0210884	0.343838	0.148695	0.050283	0.014126	0.014328
	0.034094	0.340342	0.166044	0.059006	0.019051	0.002004
	0.0227846	0.388353	0.161057	0.061831	0.010146	0.00574
	0.0819647	0.367796	0.289554	0.001785	0.0584	0
	0.0026034	0.187918	0.127803	0.083516	0.06896	0.008047
	0.00333041	0.141179	0.147355	0.20588	0.006297	0.009355
	0.0314148	0.371615	0.297056	0.005216	0.08396	8.84e-05
	0.00868739	0.48079	0.052652	0.04782	0.023501	0
WHB	0.0252227	0.267625	0.096683	0.100756	0.002126	0.00038
	0.0248202	0.139654	0.222051	0.055899	0.000107	0.054328
	0.00883412	0.396621	0.084049	0.133536	0.000111	0.010302
	0.00215796	0.42493	0.038358	0.159096	0	0.013487
	0.0185318	0.294048	0.085025	0.175112	0.002683	0.002296
	0.0696247	0.286815	0.291479	0.016938	0.034766	0.020037
	0.0217188	0.251578	0.078869	0.101543	4.34e-05	0.015817
